# Supplementary material for: Drug utilisation in neonatal units in England and Wales: a national cohort study
Source: PubMed Central journal article supplement (PMC8926961; doi:10.1007/s00228-021-03267-x), 2022-01-13

## **Supplementary material**

**Title:** Drug utilisation in neonatal units in England and Wales: a national cohort study

**Journal:** European Journal of Clinical Pharmacology

**Authors:** Asma Al-Turkait<sup>1</sup>, Lisa Szatkowski<sup>1</sup>, Imti Choonara<sup>1</sup>, Shalini Ojha<sup>1,2</sup>

<sup>1</sup>Academic Unit of Population and Lifespan Sciences, School of Medicine, University of Nottingham, Nottingham, UK.

<sup>2</sup>University Hospitals of Derby and Burton NHS Trust, Derby, UK.

**Corresponding author email:** [shalini.ojha@nottingham.ac.uk](mailto:shalini.ojha@nottingham.ac.uk).

**Online Resource table 1. Most frequently prescribed drugs among infants who received all their care in one neonatal unit in England and Wales between 2010 and 2017.**

| <b>Individual drugs</b> | <b>Special Care baby Units (Level 1)</b> | <b>Local Neonatal Units (Level 2)</b> | <b>Neonatal Intensive Care Units (Level 3)</b> |
|-------------------------|------------------------------------------|---------------------------------------|------------------------------------------------|
| Benzylopenicillin       | 42,215 (53.0)                            | 131,847 (54.6)                        | 130,023 (52.5)                                 |
| Gentamicin              | 40,570 (51.0)                            | 127,059 (52.6)                        | 128,975 (52.1)                                 |
| Cefotaxime              | 12,390 (15.6)                            | 33,876 (14.0)                         | 17,009 (6.9)                                   |
| Caffeine                | 3,464 (4.4)                              | 18,897 (7.8)                          | 20,060 (8.1)                                   |
| Sodium                  | 2,113 (2.7)                              | 10,401 (4.3)                          | 14,463 (5.8)                                   |
| Morphine (intravenous)  | 1,033 (1.3)                              | 8,693 (3.6)                           | 16,796 (6.8)                                   |
| Amoxicillin             | 2,566 (3.2)                              | 16,552 (6.9)                          | 7,039 (2.8)                                    |
| Flucloxacillin          | 1,915 (2.4)                              | 9,641 (4.0)                           | 11,336 (4.6)                                   |
| Pulmonary surfactants   | 1,200 (1.5)                              | 8,919 (3.7)                           | 10,557 (4.3)                                   |
| Nystatin (topical)      | 768 (1.0)                                | 6,415 (2.7)                           | 11,804 (4.8)                                   |
| Phosphate supplements   | 629 (0.8)                                | 6,510 (2.7)                           | 9,564 (3.9)                                    |
| Paracetamol             | 1,325 (1.7)                              | 4,702 (1.9)                           | 7,871 (3.2)                                    |
| Miconazole (topical)    | 502 (0.6)                                | 7,265 (3.0)                           | 5,165 (2.1)                                    |
| Gaviscon                | 1,787 (2.2)                              | 6,273 (2.6)                           | 4,208 (1.7)                                    |
| Ranitidine              | 1,287 (1.6)                              | 4,952 (2.1)                           | 4,973 (2.0)                                    |
| Vancomycin              | 268 (0.3)                                | 2,961 (1.2)                           | 7,624 (3.1)                                    |
| Amikacin                | 12 (0.0)                                 | 4,109 (1.7)                           | 6,069 (2.5)                                    |
| Metronidazole           | 555 (0.7)                                | 3,194 (1.3)                           | 5,387 (2.2)                                    |
| Dopamine                | 159 (0.2)                                | 1,822 (0.8)                           | 6,734 (2.7)                                    |
| Chloramphenicol         | 1,241 (1.6)                              | 3,527 (1.5)                           | 3,563 (1.4)                                    |
| Furosemide              | 256 (0.3)                                | 2,250 (0.9)                           | 5,489 (2.2)                                    |

Figures represent percentage of total number (%) of infants who received the drug at least once.

**Online Resource table 2. Change in frequency of drug use among infants born at <32 weeks' gestation in England and Wales from 2010 to 2017.**

| <b>Drug</b>                                      | <b>2010</b> | <b>2011</b> | <b>2012</b> | <b>2013</b> | <b>2014</b> | <b>2015</b> | <b>2016</b> | <b>2017</b> |
|--------------------------------------------------|-------------|-------------|-------------|-------------|-------------|-------------|-------------|-------------|
| <b>Pulmonary surfactants</b>                     | 22.6        | 24.1        | 24          | 37.1        | 42.4        | 43.3        | 43.1        | 42          |
| <b>Domperidone</b>                               | 21          | 21.2        | 20.6        | 20.5        | 11.9        | 5.2         | 4.3         | 3.4         |
| <b>Caffeine</b>                                  | 77.2        | 80          | 81.7        | 84.6        | 85.6        | 87.6        | 89.9        | 91.8        |
| <b>Probiotics</b>                                | 1.2         | 1.4         | 2.2         | 7.1         | 10          | 15.2        | 9           | 15.1        |
| <b>Benzylpenicillin</b>                          | 77.1        | 76.8        | 77.2        | 82          | 88.3        | 87.2        | 90          | 89.5        |
| <b>Gentamicin</b>                                | 80.7        | 79.2        | 80.9        | 83          | 87          | 85.6        | 89.4        | 87.9        |
| <b>Paracetamol</b>                               | 9           | 9.6         | 9.7         | 10.2        | 10.4        | 13          | 17.8        | 18.7        |
| <b>Cefotaxime</b>                                | 35          | 36.4        | 33.2        | 31.1        | 28.9        | 28.5        | 28          | 30          |
| <b>Fluconazole</b>                               | 12.7        | 15.2        | 16.4        | 18.3        | 18.8        | 19.5        | 19.9        | 21.1        |
| <b>Ranitidine</b>                                | 24.5        | 24.9        | 22.6        | 23.7        | 18          | 16.8        | 16.8        | 18          |
| <b>Nystatin (topical)</b>                        | 17          | 18.8        | 20.1        | 22.7        | 23          | 22.5        | 24.7        | 23.5        |
| <b>Phosphate supplements</b>                     | 35.8        | 37.2        | 37.3        | 38.9        | 39.9        | 40.2        | 40.1        | 41.8        |
| <b>Morphine (IV)</b>                             | 32.7        | 34          | 33.4        | 35.7        | 37.8        | 38.1        | 37.7        | 37.3        |
| <b>Chlorothiazide</b>                            | 10.5        | 12.2        | 12.7        | 14.1        | 14.6        | 15.7        | 14.7        | 15.3        |
| <b>Cyclopentolate 0.5% (ocular)</b>              | 8           | 9           | 9.1         | 10.7        | 11.8        | 11.8        | 11.8        | 13.1        |
| <b>Fentanyl</b>                                  | 2.8         | 4           | 3.9         | 4.1         | 4.3         | 5.5         | 6.1         | 7.8         |
| <b>Indomethacin</b>                              | 5.1         | 2.6         | 4.5         | .7          | .4          | .6          | .5          | .4          |
| <b>Spirolactone</b>                              | 14.6        | 16.3        | 17.2        | 18.1        | 18.8        | 19.3        | 18.4        | 18.9        |
| <b>Phenylephrine hydrochloride 2.5% (ocular)</b> | 8.7         | 9.9         | 10.2        | 11.8        | 12.3        | 12.1        | 12.4        | 13.3        |
| <b>Suxamethonium</b>                             | 6.8         | 7.9         | 8           | 9.8         | 9.9         | 10.3        | 10.2        | 11.3        |
| <b>Atropine</b>                                  | 5.3         | 6.7         | 7           | 8.2         | 7.9         | 8.5         | 8.2         | 9.6         |
| <b>Insulin</b>                                   | 12.5        | 13.5        | 13.4        | 13.8        | 14.6        | 16.2        | 16.1        | 16.8        |
| <b>Furosemide</b>                                | 19.6        | 22          | 22.1        | 22          | 22.5        | 22.5        | 23.7        | 22.7        |
| <b>Nitric oxide</b>                              | 2.4         | 2.6         | 3.5         | 4.6         | 5.6         | 6.1         | 6.2         | 6.5         |
| <b>Amoxicillin</b>                               | 11.8        | 13.9        | 14.1        | 12.4        | 10.7        | 10.2        | 10.3        | 10.3        |
| <b>Omeprazole</b>                                | 4           | 4.8         | 4.5         | 4.8         | 4.9         | 5.8         | 6.4         | 7.9         |
| <b>Glycerol suppository</b>                      | 8.2         | 8.9         | 9.4         | 9.9         | 10.1        | 10.2        | 11.4        | 11.9        |
| <b>Dopamine</b>                                  | 14.8        | 16.8        | 15.5        | 16.2        | 18.3        | 18.2        | 18.2        | 18          |
| <b>Ibuprofen</b>                                 | 5.2         | 8.2         | 6.8         | 8           | 8.1         | 7.7         | 8.6         | 7.7         |
| <b>Metronidazole</b>                             | 18          | 19.1        | 18.5        | 18.4        | 16.6        | 15.7        | 16.3        | 16.8        |
| <b>Dobutamine</b>                                | 9.7         | 10.6        | 9.3         | 9.9         | 12          | 11.6        | 12.4        | 11.6        |
| <b>Gaviscon</b>                                  | 22.7        | 22.5        | 21.5        | 20.7        | 20.8        | 20.6        | 19.9        | 19.7        |

Figures represent percentage of total number of infants who received the drug at least once.

**Online Resource Figure 1.** Infants included in the study of drug utilisation among infants admitted to neonatal units in England and Wales (2010 to 2017)

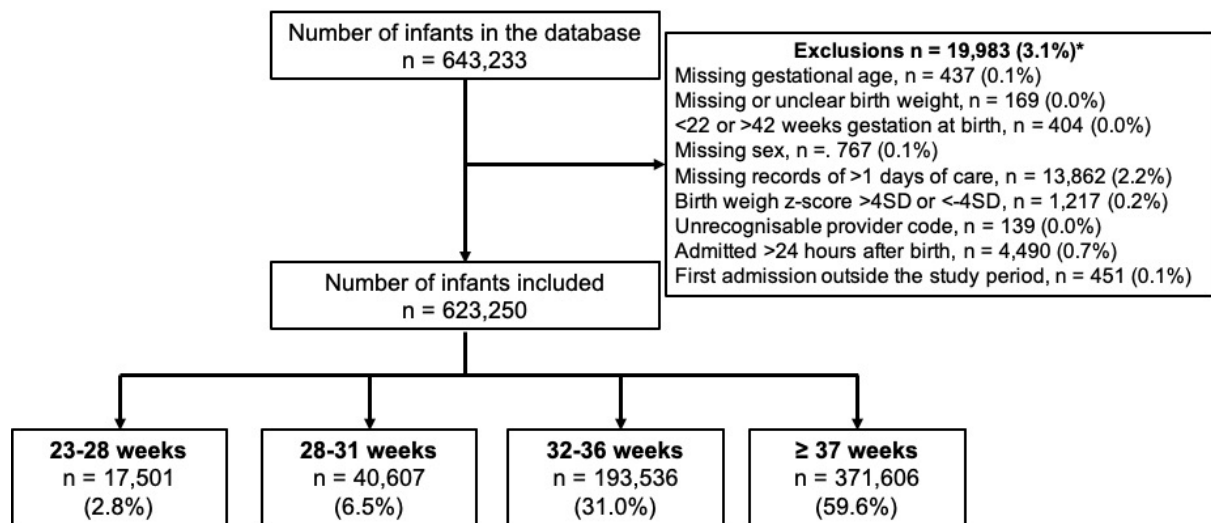

**Online Resource Figure 2.** Number of admissions in each gestational age at birth category among infants admitted to neonatal units in England and Wales (2010 to 2017)

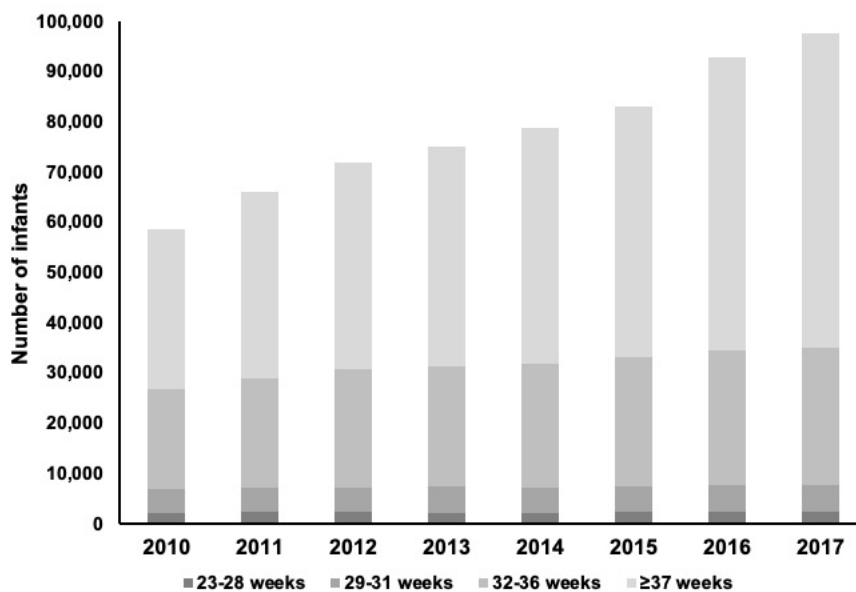

Supplement: 228_2021_3267_MOESM1_ESM.pdf [file 228_2021_3267_MOESM1_ESM.pdf]
